# Supplementary material for: Self-assembly of tetrametallic square [Re4(CO)12Br4(µ-pz)4] (pz = pyrazine) from [Re(CO)4Br(pz)]. A mechanistic approach
Source: Royal Society of Chemistry journal article supplement (doi:10.1039/b101992i), 2001-01-01
Supplement: b101992i.doc [file b101992i.doc]

Supporting Information

For

**Self-assembly of tetrametallic square [Re(CO)3Br(-pz)]4 (pz = pyrazine) from [Re(CO)4Br(pz)]. A mechanistic approach**

**T. Rajendran,*a* Bala. Manimaran,*a* Fang-Yuan Lee,*a* Po-Jui Chen,*a* Su-Ching Lin,*a* Gene-Hsiang Lee,*b* Shie-Ming Peng,*ab* Yu-Ju Chen,**a*** **and Kuang-Lieh Lu**a***

*a Institute of Chemistry, Academia Sinica, Taipei, 115, Taiwan*

*b Department of Chemistry, National Taiwan University, Taipei, 107, Taiwan*

Contents

Experimental section for X-ray structure of **9**

Elemental analysis data of **9**

Table 1 Crystal data and structure refinement for **9**

Table 2 Atomic positional parameters for **9**

Table 3 Bond lengths (Å) and angles () for **9**

Table 4 Anisotropic thermal parameters for **9**

**Experimental section for X-ray structure of 9**

Data collection of compound **9** were carried out on a Nonius Kappa CCD diffractometer with Mo radiation ( = 0.71073 Å) at 200(1) K. A preliminary orientation matrix and unit cell parameters were determined from 20 frames; each frame corresponds to the 1 degree  scan in 5 s, followed by spot integration and least-squares refinement. Data were measured using  scans, 2 degree per frame, 40 s per degree until two runs of different Phi angles had been collected. The detector was put at the position of 2.5 cm. Cell parameters were retrieved and refined using *DENZO-SMN*1 software on all reflections. Data reduction was performed with the *DENZO-SMN*1 software. Absorption corrections were applied with the program *SORTAV*.2 The structure was solved using the *SHELXS-97*3 program and refined using *SHELXL-97*4 program by full-matrix least squares on *F*2 values. Hydrogen atoms were fixed at calculated positions and refined using a riding mode. Detailed crystal data are listed in Table 1.

References:

1. Z. Otwinowski, W. Minor, *Methods Enzymol*., 1997, **276**, 307.
2. R. H. Blessing, *Acta Crystallogr*., *Sect. A*, 1995, **51**, 33.
3. G. M. Sheldrick, SHELXS 97, Program for Crystal Structure Determination, University of Gottingen, 1997.
4. G. M. Sheldrick, SHELXL 97, Program for Crystal Structure Refinement, University of Gottingen, 1997.

**Elemental analysis data of 9**

Calculated for **9** (C28H16N8O12Br4Re4)·1.5 acetone: C, 21.59; H, 1.39; N, 6.20. Found: C, 21.77; H, 1.52; N, 5.86.

Since the molecular square **9** contain large cavity the solvent molecules like acetone occupy inside the molecular cavity which could not be removed even after long time vacuum drying. This is also evidenced from the X-ray structure of **9**. Therefore compound **9** always contain solvent acetone molecule in the solid state samples used for the elemental analysis. The elemental analysis results matches with compound **9** with solvent acetone molecules.
